# Supplementary material for: Substitution driven structural and magnetic properties and evidence of spin phonon coupling in Sr-doped BiFeO3 nanoparticles
Source: Royal Society of Chemistry journal article supplement (doi:10.1039/c6ra11021e), 2016-01-01
Supplement: c6ra11021e1.pdf [file c6ra11021e1.pdf]

## Supplementary Information

**Substitution driven Structural and Magnetic properties and Evidence of Spin Phonon Coupling in**

**Sr-doped BiFeO<sub>3</sub> nanoparticles**

Sunil Chauhan,<sup>a</sup> Manoj Kumar,<sup>\*a</sup> and Prabir Pal<sup>b</sup>

*<sup>a</sup>Department of Physics and Materials Science & Engineering, Jaypee Institute of Information Technology, A-10, Sector-62, Noida-201307, India. \* mkumar.phy@gmail.com*

*<sup>b</sup>Academy of Scientific and Innovative Research (AcSIR), CSIR-National Physical Laboratory (CSIR-NPL) Campus, Dr K S Krishnan Road, New Delhi 110012, India*

**Table S1** Rietveld refined parameters of  $\text{Bi}_{1-x}\text{Sr}_x\text{FeO}_3$  nanostructured samples.

| Samples                | Lattice parameters                 | Atoms Positions | x             | y             | z             | R-factors (%)                                      |
|------------------------|------------------------------------|-----------------|---------------|---------------|---------------|----------------------------------------------------|
| <b>x=0</b>             | a=5.57516 (6) (Å)                  | Fe              | 0.0           | 0.0           | 0.01903(92)   | $R_{\text{wp}} = 3.17$                             |
|                        | c=13.85908(20)(Å)                  | Bi              | 0.0           | 0.0           | 0.29745(85)   | $R_{\text{p}} = 2.49$                              |
| <b>R3c</b>             | V = 373.061(8) (Å <sup>3</sup> )   | O               | 0.23075(15)   | 0.35815(209)  | 0.0833        | $R_{\text{f}} = 1.75$<br>$R_{\text{Bragg}} = 1.17$ |
| <b>x=0.05</b>          | a = 5.57663 (6) (Å)                | Fe              | 0.0           | 0.0           | 0.01629( 108) | $R_{\text{wp}} = 4.86$                             |
| <b>R3c</b>             | c = 13.83109(38) (Å)               | Bi/Sr           | 0.0           | 0.0           | 0.29309( 104) | $R_{\text{p}} = 3.84$                              |
|                        | V = 372.504(12)(Å <sup>3</sup> )   | O               | 0.24008( 283) | 0.35873( 220) | 0.0833        | $\chi^2 = 2.03$                                    |
| <b>x=0.10</b>          | a = 5.57645(5) (Å)                 | Fe              | 0.0           | 0.0           | 0.01981( 95)  | $R_{\text{wp}} = 4.52$                             |
| <b>R3c</b>             | c = 13.84578 (29) (Å)              | Bi/Sr           | 0.0           | 0.0           | 0.29738( 86)  | $R_{\text{p}} = 3.56$                              |
|                        | V = 372.875(9) (Å <sup>3</sup> )   | O               | 0.23943( 255) | 0.37170( 181) | 0.0833        | $\chi^2 = 1.98$                                    |
| <b>x=0.15</b>          | a = 5.57536 (6) (Å)                | Fe              | 0.0           | 0.0           | 0.01674( 109) | $R_{\text{wp}} = 4.44$                             |
| <b>R3c</b>             | c = 13.83676 (40) (Å)              | Bi/Sr           | 0.0           | 0.0           | 0.29589( 107) | $R_{\text{p}} = 3.53$                              |
|                        | V = 372.487(12) (Å <sup>3</sup> )  | O               | 0.25005( 319) | 0.40282( 229) | 0.0833        | $\chi^2 = 1.95$                                    |
| <b>x=0.20</b>          | a = 5.57475 (6)(Å)                 | Fe              | 0.0           | 0.0           | 0.01415( 109) | $R_{\text{wp}} = 4.15$                             |
| <b>R3c</b>             | c = 13.83385 (36) (Å)              | Bi/Sr           | 0.0           | 0.0           | 0.29138( 105) | $R_{\text{p}} = 3.32$                              |
|                        | V = 372.326 (11) (Å <sup>3</sup> ) | O               | 0.24293( 297) | 0.37768( 215) | 0.0833        | $\chi^2 = 1.67$                                    |
| <b>x=0.25</b>          | a = 5.58034 (26) (Å)               | Fe              | 0.0           | 0.0           | 0.02896( 175) | $R_{\text{wp}} = 4.54$                             |
| <b>R3c (65.25%)</b>    | c = 13.84518 (76) (Å)              | Bi/Sr           | 0.0           | 0.0           | 0.30717( 163) | $R_{\text{p}} = 3.57$                              |
|                        | V = 373.380 (32) (Å <sup>3</sup> ) | O               | 0.25597( 406) | 0.35376( 285) | 0.0833        | $R_{\text{f1}} = 1.94$                             |
| <b>P4/mmm (34.75%)</b> | a = 3.93373 (22) (Å)               | Bi/Sr           | 0             | 0             | 0             | $R_{\text{Bragg1}} = 2.16$                         |
|                        | c = 3.97941 (31) (Å)               | Fe              | 0.5           | 0.5           | 0.5           | $R_{\text{f2}} = 1.69$                             |
|                        |                                    | O               | 0.5           | 0.5           | 0             | $R_{\text{Bragg2}} = 2.47$                         |
|                        | V = 61.578 (7) (Å <sup>3</sup> )   | O               | 0.5           | 0             | 0.5           | $\chi^2 = 1.86$                                    |

**Table S2** Selected bond lengths, angles and bond valence sums (BVS) of  $\text{Bi}_{1-x}\text{Sr}_x\text{FeO}_3$  nanoparticles.

| <b>Bonds</b>     | <b>x=0.00</b> | <b>x=0.05</b> | <b>x=0.10</b> | <b>x=0.15</b> | <b>x=0.20</b> | <b>x=0.25</b> |
|------------------|---------------|---------------|---------------|---------------|---------------|---------------|
| <b>Fe-Oshort</b> | 1.966(16)     | 1.995(16)     | 2.021(15)     | 1.900(13)     | 1.963(16)     | 1.920(16)     |
| <b>Fe-Olong</b>  | 2.078(15)     | 2.054(16)     | 2.039(11)     | 2.170(16)     | 2.082(16)     | 2.213(20)     |
| <b>Bi-O1</b>     | 2.243(15)     | 2.290(16)     | 2.201(15)     | 2.118(16)     | 2.224(16)     | 2.185(20)     |
| <b>Bi-O2</b>     | 2.586(18)     | 2.525(17)     | 2.583(17)     | 2.618(17)     | 2.561(17)     | 2.481(15)     |
| <b>Bi-O3</b>     | 3.149(16)     | 3.184(18)     | 3.159(17)     | 3.141(18)     | 3.148(18)     | 3.328(15)     |
| <b>Bi-O4</b>     | 3.447(14)     | 3.397(15)     | 3.478(13)     | 3.537(16)     | 3.421(16)     | 3.57(2)       |
| <b>Fe-O-Fe</b>   | 156.8(7)      | 155.9(8)      | 154.7(8)      | 153.2(8)      | 151.3(8)      | 146.9(13)     |
| <b>Bi-O-Bi</b>   | 110.1(6)      | 110.6(7)      | 111.5(6)      | 113.0(7)      | 113.8(7)      | 116.1(1)      |
| <b>BVS Bi</b>    | 2.798(45)     | 2.635(46)     | 2.914(47)     | 3.310(63)     | 3.342(50)     | 3.399(83)     |
| <b>BVS Fe</b>    | 2.981(46)     | 2.863(46)     | 2.762(42)     | 2.840(49)     | 2.981(49)     | 2.821(70)     |
| <b>BVS Sr</b>    | -             | 2.812(46)     | 3.110(50)     | 3.531(63)     | 3.541(53)     | 3.627(89)     |
| <b>BVS O</b>     | 1.926(32)     | 1.883(33)     | 1.977(31)     | 2.204(42)     | 2.215(33)     | 2.092(50)     |

**Table S3** Raman modes positions and FWHMs of  $\text{Bi}_{1-x}\text{Sr}_x\text{FeO}_3$  nanoparticles.

| S. No. | Mode                      | x = 0.0                               |                                     | x = 0.05                              |                                     | x = 0.10                              |                                     | x = 0.15                              |                                     | x = 0.20                              |                                     | x = 0.25                              |                                     |
|--------|---------------------------|---------------------------------------|-------------------------------------|---------------------------------------|-------------------------------------|---------------------------------------|-------------------------------------|---------------------------------------|-------------------------------------|---------------------------------------|-------------------------------------|---------------------------------------|-------------------------------------|
|        |                           | Center<br>$\omega_i$ $\text{cm}^{-1}$ | FWHM<br>$\Gamma_i$ $\text{cm}^{-1}$ |
| 1      | E( $\text{TO}_1$ )        | 71.1                                  | 8.9                                 | 69.9                                  | 8.7                                 | 66.7                                  | 8.3                                 | 65.5                                  | 8.4                                 | 64.9                                  | 5.9                                 | 63.6                                  | 8.9                                 |
| 2      | E( $\text{LO}_1$ )        | 76.6                                  | 5.3                                 | 75.4                                  | 5.4                                 | 74.1                                  | 8.8                                 | 74.6                                  | 7.1                                 | 74.5                                  | 9.1                                 | 73.6                                  | 13.2                                |
| 3      | E( $\text{TO}_2$ )        | 139.2                                 | 27.7                                | 138.9                                 | 28.9                                | 139.9                                 | 33                                  | 140                                   | 32                                  | 140.3                                 | 29.8                                | 141.4                                 | 32.6                                |
| 4      | $A_1$ ( $\text{TO}_1$ )   | 172.3                                 | 10.9                                | 170.9                                 | 12.4                                | 170.3                                 | 14.1                                | 170.4                                 | 14.1                                | 170.1                                 | 13                                  | 169.1                                 | 20.4                                |
| 5      | $A_1$ ( $\text{TO}_2$ )   | 218.4                                 | 17.9                                | 217                                   | 15                                  | 216                                   | 13.4                                | 218.6                                 | 18.4                                | 222.1                                 | 18.4                                | 221.4                                 | 15.5                                |
| 6      | E( $\text{TO}_3$ )        | 232.2                                 | 23.5                                | 228.8                                 | 21.1                                | 226.2                                 | 17.4                                | 229.4                                 | 19.2                                | 246                                   | 10.8                                | 233.2                                 | 20.9                                |
| 7      | E( $\text{TO}_4$ )        | 261.2                                 | 19.3                                | 260.2                                 | 22.4                                | 257.3                                 | 29.4                                | 256.8                                 | 27.6                                | 263                                   | 20.8                                | 257.9                                 | 24.9                                |
| 8      | E( $\text{TO}_5$ )        | 278.1                                 | 23.8                                | 277.1                                 | 25.8                                | 275.3                                 | 24.4                                | 274.3                                 | 24.3                                | 283.5                                 | 22.3                                | 286.6                                 | 22.2                                |
| 9      | $A_1$ ( $\text{TO}_3$ )   | 302.4                                 | 37.3                                | 303.7                                 | 36.4                                | 305                                   | 36.4                                | 294.1                                 | 27                                  | 300.7                                 | 11.4                                | 297.8                                 | 19                                  |
| 10     | E( $\text{TO}_6$ )        | 346.6                                 | 27.5                                | 344.6                                 | 26.8                                | 341.1                                 | 32.1                                | 342.5                                 | 36.8                                | 329.9                                 | 22.9                                | 327.6                                 | 26.4                                |
| 11     | E( $\text{TO}_7$ )        | 369.7                                 | 10.9                                | 368.1                                 | 12.6                                | 367.7                                 | 16.6                                | 367.4                                 | 16.7                                | 362.4                                 | 11.6                                | 364.7                                 | 17.8                                |
| 12     | E( $\text{TO}_8$ )        | 436.3                                 | 11.4                                | 431.6                                 | 13.8                                | 441.9                                 | 17.9                                | 435.9                                 | 46.8                                | 424.1                                 | 24.2                                | 428.7                                 | 45.9                                |
| 13     | E( $\text{LO}_8$ )        | 471.2                                 | 32.6                                | 471.3                                 | 35.9                                | 473.1                                 | 34.1                                | 472.5                                 | 41.1                                | 475.6                                 | 45.1                                | 477.6                                 | 45.8                                |
| 14     | E( $\text{TO}_9$ )        | 524.0                                 | 29.6                                | 521.1                                 | 35.1                                | 516.3                                 | 46.7                                | 520.5                                 | 47.6                                | 520.3                                 | 55.7                                | 525.4                                 | 36.7                                |
| 15     | $A_1$ ( $\text{TO}_4$ )   | 550.8                                 | 30.6                                | 544.5                                 | 40.2                                | 544.2                                 | 35.2                                | 545.6                                 | 43.1                                | 553.5                                 | 21.6                                | 557                                   | 30.1                                |
| 16     | E( $\text{LO}_9$ )        | 608.2                                 | 42.9                                | 609.4                                 | 44.1                                | 614.3                                 | 54.8                                | 611.5                                 | 45.8                                | 610.4                                 | 26.5                                | 618.7                                 | 41.5                                |
| 17     | -                         | -                                     | -                                   | 689.3                                 | 84.8                                | 676.1                                 | 92.9                                | 677.4                                 | 105.4                               | 646.8                                 | 88.2                                | 680.7                                 | 76.9                                |
| 18     | 2E( $\text{LO}_8$ )       | 938.4                                 | 72.9                                | 943.8                                 | 89.4                                | 940.9                                 | 65.1                                | 947.2                                 | 124.9                               | 949.9                                 | 97.5                                | 935.4                                 | 177.7                               |
| 19     | 2E( $\text{TO}_9$ )       | 1038.8                                | 102.7                               | 1030.3                                | 78.6                                | 1042.6                                | 103.9                               | 1039.7                                | 70.8                                | 1045.7                                | 66.7                                | 1037.3                                | 73                                  |
| 20     | 2 $A_1$ ( $\text{TO}_4$ ) | 1101.2                                | 58.7                                | 1095.2                                | 62.4                                | 1101.1                                | 55.1                                | 1100.3                                | 77.9                                | 1109.8                                | 74.2                                | 1097.2                                | 61.9                                |
| 21     | 2 $A_1$ ( $\text{LO}_4$ ) | 1147.6                                | 47.3                                | 1144.5                                | 55.5                                | 1144.7                                | 55.3                                | 1150.1                                | 76.8                                | 1177.3                                | 116.4                               | 1154.1                                | 81.2                                |
| 22     | 2E( $\text{LO}_9$ )       | 1264.3                                | 142.4                               | 1266.8                                | 142.83                              | 1268.1                                | 142.7                               | 1283                                  | 147.5                               | 1298.5                                | 134.7                               | 1292.2                                | 164.7                               |
